# Supplementary material for: Effect of cysteine thiols on the catalytic and anticancer activity of Ru(ii) sulfonyl-ethylenediamine complexes
Source: Royal Society of Chemistry journal article supplement (doi:10.1039/d1dt03856g), 2022-01-01
Supplement: d1dt03856g1.pdf [file d1dt03856g1.pdf]

## Electronic Supplementary Information (ESI)

### Effect of cysteine thiols on the catalytic and anticancer activity of Ru(II) sulfonyl-ethylenediamine complexes

Feng Chen, Isolda Romero-Canelón, Abraha Habtemariam, Ji-Inn Song, Samya Banerjee, Guy J. Clarkson, Lijiang Song, Ivan Prokes and Peter J. Sadler

#### Contents

#### Ligand Synthesis

**Table S1.** X-ray crystallographic data for complex **3**

**Table S2.** Selected hydrogen bond lengths and angles for complex **3**.

**Table S3.** MS peak assignments for products from reactions of complex **2** with GSH and NAC

**Table S4.** Antiproliferative activity of complex **2** towards human A549 lung cancer and A2780 ovarian cancer cells with sequential administration 1 mol equiv of GSH and NAC

**Figures S1-S17.** NMR spectra of complexes **1-8**

**Figures S18-S25.** High resolution mass spectra of complexes **1-8**

**Figure S26.** Dependence of NMR chemical shifts of the arene protons of aqua species of complexes **1, 2** and **4-7** on pH\*

**Figure S27.** <sup>1</sup>H NMR spectra for titration of complex **2** (2 mM) with 9-ethylguanine

**Figure S28.** 600 MHz <sup>1</sup>H NMR spectra for reactions between complex **8** and GSH

**Figure S29.** HPLC chromatograms for reactions of complex **2** with GSH or NAC

**Figure S30.** <sup>1</sup>H NMR spectrum of complex **2b**

**Figure S31.** High resolution mass spectrum of complex **2a**

**Figure S32.** High resolution mass spectrum of complex **2b**

#### Reference

## Ligand Synthesis

**N-(2-(benzylamino)ethyl)-4-nitrobenzenesulfonamide (4-NO<sub>2</sub>-phenyl-SO<sub>2</sub>-EnBz).**<sup>1</sup> A solution of N-benzylethylenediamine (0.214 mL, 1.43 mmol) in DCM (100 mL) was placed in a round-bottom flask. A solution of 4-nitrobenzenesulfonyl chloride (0.3 g, 1.36 mmol) in DCM (50 mL) was added slowly via a dropping funnel, and the mixture was stirred vigorously for 12 h. The solvent was removed on a rotary evaporator and the product further purified on a silica gel column (10% MeOH and 90% DCM) to give a white solid. Yield = 246 mg (54%). <sup>1</sup>H NMR (400 MHz, CDCl<sub>3</sub>): δ<sub>H</sub> 2.73 (t, *J* = 5.8 Hz, 2H), 3.05 (t, *J* = 5.8 Hz, 2H), 3.67 (s, 2H), 7.21 (d, *J* = 6.8 Hz, 2H), 7.28-7.33 (m, 3H), 7.99 (d, *J* = 8.9 Hz, 2H), 8.30 (d, *J* = 8.6 Hz, 2H); ESI-MS: *Calc* for [C<sub>15</sub>H<sub>17</sub>N<sub>3</sub>O<sub>4</sub>S + H]<sup>+</sup> 336.1 m/z, found: 335.9 m/z.

**N-(2-(benzylamino)ethyl)benzenesulfonamide (phenyl-SO<sub>2</sub>-EnBz).** A solution of N-benzylethylene diamine (0.50 mL, 3.33 mmol) in dichloromethane (100 mL) was placed in a round-bottom flask. A solution of benzenesulfonyl chloride (0.212 mL, 1.664 mmol) in DCM (50 mL) was added slowly via a dropping funnel, and the mixture was stirred vigorously for 12 h. The solvent was removed on a rotary evaporator and the product further purified on a silica gel column (10% MeOH and 90% DCM) to get white solid. Yield = 323 mg (67%). <sup>1</sup>H NMR (400 MHz, CDCl<sub>3</sub>): δ<sub>H</sub> 2.67 (t, *J* = 5.8 Hz, 2H), 3.00 (t, *J* = 5.8 Hz, 2H), 3.62 (s, 2H), 7.19-7.21 (m, 2H), 7.22-7.24 (m, 1H), 7.28-7.31 (m, 2H), 7.45-7.48 (m, 2H), 7.52-7.56 (m, 1H), 7.82-7.85 (m, 2H); ESI-MS: *Calc* for [C<sub>15</sub>H<sub>18</sub>N<sub>2</sub>O<sub>2</sub>S + H]<sup>+</sup> 291.1 m/z, found: 290.8 m/z.

**N-(2-(benzylamino)ethyl)-4-fluorobenzenesulfonamide (4-F-phenyl-SO<sub>2</sub>-EnBz).** A solution of N-benzyl ethylenediamine (0.278 mL, 1.85 mmol) in dichloromethane (100 mL) was placed in a round-bottom flask. A solution of 4-fluorobenzenesulfonyl chloride (0.3 g, 1.54 mmol) in DCM (50 mL) was added slowly via a dropping funnel, and the mixture was stirred vigorously for 12 h. The solvent was removed on a rotary evaporator and the product further

purified on a silica gel column (10% MeOH and 90% DCM) to give a white solid. Yield = 270 mg (57%).  $^1\text{H NMR}$  (400 MHz,  $\text{CDCl}_3$ ):  $\delta_{\text{H}}$  2.71 (t,  $J = 5.8$  Hz, 2H), 3.00 (t,  $J = 5.8$  Hz, 2H), 3.66 (s, 2H), 7.15 (t,  $J = 8.6$  Hz, 2H), 7.22 (d,  $J = 6.9$  Hz, 2H), 7.28-7.33 (m, 2H), 7.83-7.86 (m, 2H); ESI-MS: *Calc* for  $[\text{C}_{15}\text{H}_{17}\text{FN}_2\text{O}_2\text{S} + \text{H}]^+$  309.1 m/z, found: 308.8 m/z.

**N-(2-(benzylamino)ethyl)-5-(dimethylamino)naphthalene-1-sulfonamide (DsEnBz).** A solution of N-benzylethylenediamine (0.267 mL, 1.78 mmol) in dichloromethane (100 mL) was placed in a round-bottom flask. A solution of dansyl chloride (400 mg, 1.483 mmol) in DCM (50 mL) was added slowly via a dropping funnel, and the mixture was stirred vigorously for 12 h. The solvent was removed on a rotary evaporator and the product further purified on a silica gel column (6% MeOH and 94% DCM) to give a white solid. Yield = 324 mg (57%).  $^1\text{H NMR}$  (400 MHz,  $\text{MeOD-d}_4$ ):  $\delta_{\text{H}}$  2.51 (t,  $J = 6.2$  Hz, 2H), 2.87 (s, 6H), 2.99 (t,  $J = 6.2$  Hz, 2H), 3.46 (s, 2H), 7.09 (d,  $J = 6.6$  Hz, 2H), 7.20-7.28 (m, 4H), 7.55-7.60 (m, 2H), 8.21 (dd,  $J = 0.92$  Hz, 7.2 Hz, 2H), 8.33 (d,  $J = 8.6$  Hz, 1H), 8.56 (d,  $J = 8.5$  Hz, 1H); ESI-MS: *Calc* for  $[\text{C}_{21}\text{H}_{26}\text{N}_3\text{O}_2\text{S} + \text{H}]^+$  384.1 m/z, found: 384.2 m/z.

**Table S1.** Crystallographic data for complex **3**.

|                                         |                                                                    |
|-----------------------------------------|--------------------------------------------------------------------|
| Crystal character                       | Red block                                                          |
| Empirical formula                       | C <sub>28</sub> H <sub>29</sub> IN <sub>2</sub> O <sub>2</sub> RuS |
| Formula weight                          | 685.56                                                             |
| Temp (K)                                | 150(2)                                                             |
| Crystal system                          | monoclinic                                                         |
| Space group                             | P <sub>n</sub>                                                     |
| <i>a</i> /Å                             | 10.91549(4)                                                        |
| <i>b</i> /Å                             | 9.33603(4)                                                         |
| <i>c</i> /Å                             | 13.28373(5)                                                        |
| $\alpha$ /°                             | 90                                                                 |
| $\beta$ /°                              | 98.2296(3)                                                         |
| $\gamma$ /°                             | 90                                                                 |
| Volume/Å <sup>3</sup>                   | 1339.768(9)                                                        |
| <i>Z</i>                                | 2                                                                  |
| D <sub>calc</sub> (mg/cm <sup>3</sup> ) | 1.699                                                              |
| $\mu$ /mm <sup>-1</sup>                 | 14.728                                                             |
| <i>F</i> (000)                          | 680.0                                                              |
| Crystal size/mm <sup>3</sup>            | 0.6 × 0.16 × 0.08 orange block                                     |
| Reflections collected                   | 38933                                                              |
| Indep reflection                        | 5343                                                               |
| R [ <i>I</i> ≥ 2σ ( <i>I</i> )]         | R <sup>1</sup> = 0.0168                                            |
| Final R [all data]                      | R <sup>2</sup> = 0.0426                                            |
| CCDC No.                                | 2117792                                                            |

**Table S2.** Selected hydrogen bond lengths (Å) and angle (°) for complex **3**.

| D   | H   | A  | d(D-H)/Å | d(H-A)/Å | d(D-A)/Å | D-H-A/° |
|-----|-----|----|----------|----------|----------|---------|
| N12 | H12 | I1 | 0.85(6)  | 2.83(5)  | 3.315(3) | 118(4)  |

**Table S3.** MS peak assignments for products from reactions of complex **2** with GSH and NAC (10 mol equiv, MeOH/H<sub>2</sub>O, 1: 9 (v/v), pH 7). Fore HPLC peak numbering, see Fig. S4; mass spectra shown in Figures S6 and S7.

| Peak | Retention time (min) | Mass (m/z) | Assignment                                                                                          |
|------|----------------------|------------|-----------------------------------------------------------------------------------------------------|
| p1   | 17.3                 | 715.67     | $[(\eta^6\text{-biph})_2\text{Ru}_2(\text{GS})_3+4\text{H}]^{2+}$                                   |
| p2   | 27.6                 | 997.89     | $[(\eta^6\text{-biph})_2\text{Ru}_2(\text{NAC})_3]^+$                                               |
| p3   | 31.6                 | 305.20     | ligand [TsEnBz]+H <sup>+</sup>                                                                      |
| p4   | 34.7                 | 559.10     | complex <b>2</b> , [C <sub>28</sub> H <sub>29</sub> N <sub>2</sub> O <sub>2</sub> RuS] <sup>+</sup> |

**Table S4.** Antiproliferative activity of complex **2** towards human A549 lung cancer and A2780 ovarian cancer cells with sequential administration of 1 mol equiv of GSH or NAC at various concentrations (5, 10 and 50  $\mu\text{M}$ ).<sup>a</sup>

| Thiol addition          | Cell line <sup>a</sup>             |                  |
|-------------------------|------------------------------------|------------------|
|                         | A549                               | A2780            |
|                         | IC <sub>50</sub> ( $\mu\text{M}$ ) |                  |
| None ( <b>2</b> alone)  | 13.5 $\pm$ 1.4                     | 11.25 $\pm$ 0.08 |
| GSH (5 $\mu\text{M}$ )  | 22.4 $\pm$ 1.3                     | 27.3 $\pm$ 0.5   |
| GSH (10 $\mu\text{M}$ ) | 22.9 $\pm$ 2.1                     | 43.9 $\pm$ 3.5   |
| GSH (50 $\mu\text{M}$ ) | >50                                | > 50             |
| NAC (5 $\mu\text{M}$ )  | 25.8 $\pm$ 0.9                     | n.d.             |
| NAC (10 $\mu\text{M}$ ) | 39.9 $\pm$ 0.3                     | n.d.             |
| NAC (50 $\mu\text{M}$ ) | > 50                               | n.d.             |

<sup>a</sup> Data are shown as mean  $\pm$  standard deviation (STD). GSH or NAC was added to cells first, followed by adding complex **2** (with 10 min); following SRB protocols, cell viability was assessed after 24 h incubation with Ru<sup>II</sup> complexes and washing with PBS.

**Table S5.** Induction of ROS and superoxide determined by flow cytometry experiments on A2780 human ovarian cancer cells.

| Complex                  | Population (%) |                |                 |                |
|--------------------------|----------------|----------------|-----------------|----------------|
|                          | FITC-A-/PE-A+  | FITC-A+/PE-A+  | FITC-A+/PE-A-   | FITC-A-/PE-A-  |
| <b>2</b>                 | 15.4 ± 0.6 *** | 1.4 ± 0.2 ***  | 71.7 ± 1.7 ***  | 11.4 ± 1.4 *** |
| <b>2+GSH</b><br>(0.5 μM) | 13.2 ± 0.6 *** | 0.7 ± 0.1 **   | 70.3 ± 0.4 ***  | 15.8 ± 0.4 *** |
| <b>2+GSH</b><br>(5 μM)   | 5.2 ± 0.4 **   | 0.67 ± 0.15 ** | 86.3 ± 0.5 ***  | 7.8 ± 0.4 ***  |
| Positive                 | 0.66 ± 0.08 ** | 98.8 ± 0.3 *** | 0.77 ± 0.15 *** | 0 ***          |
| Negative                 | 2.97 ± 0.15    | 1.53 ± 0.06    | 9.3 ± 0.3       | 86.2 ± 0.5     |

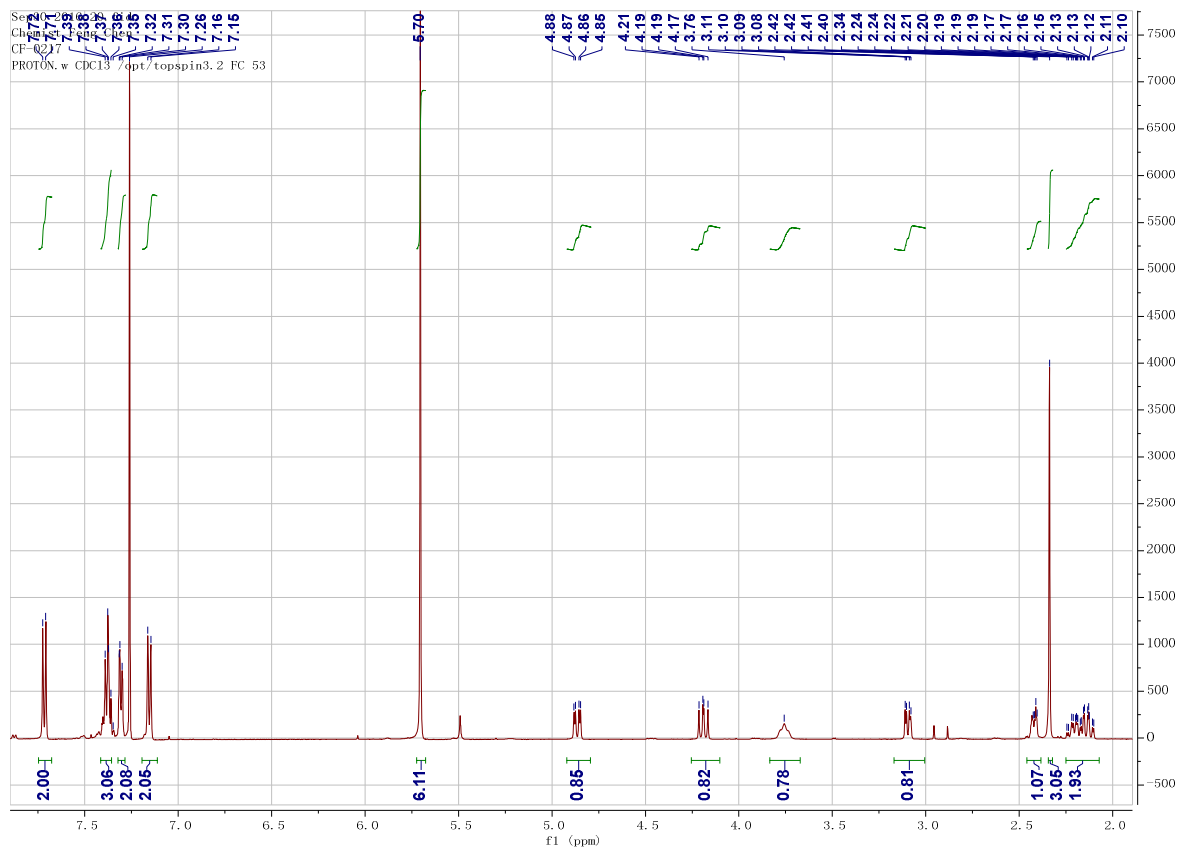

Figure S1. <sup>1</sup>H NMR spectrum of complex 1

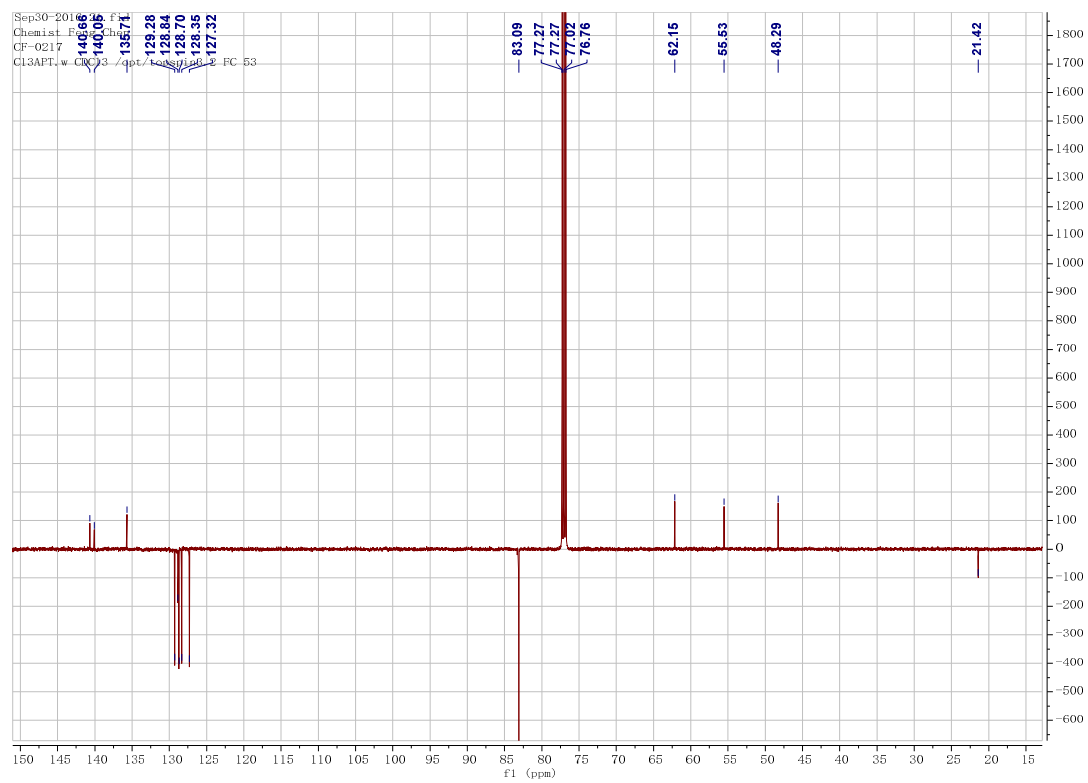

Figure S2. <sup>13</sup>C NMR spectrum of complex 1

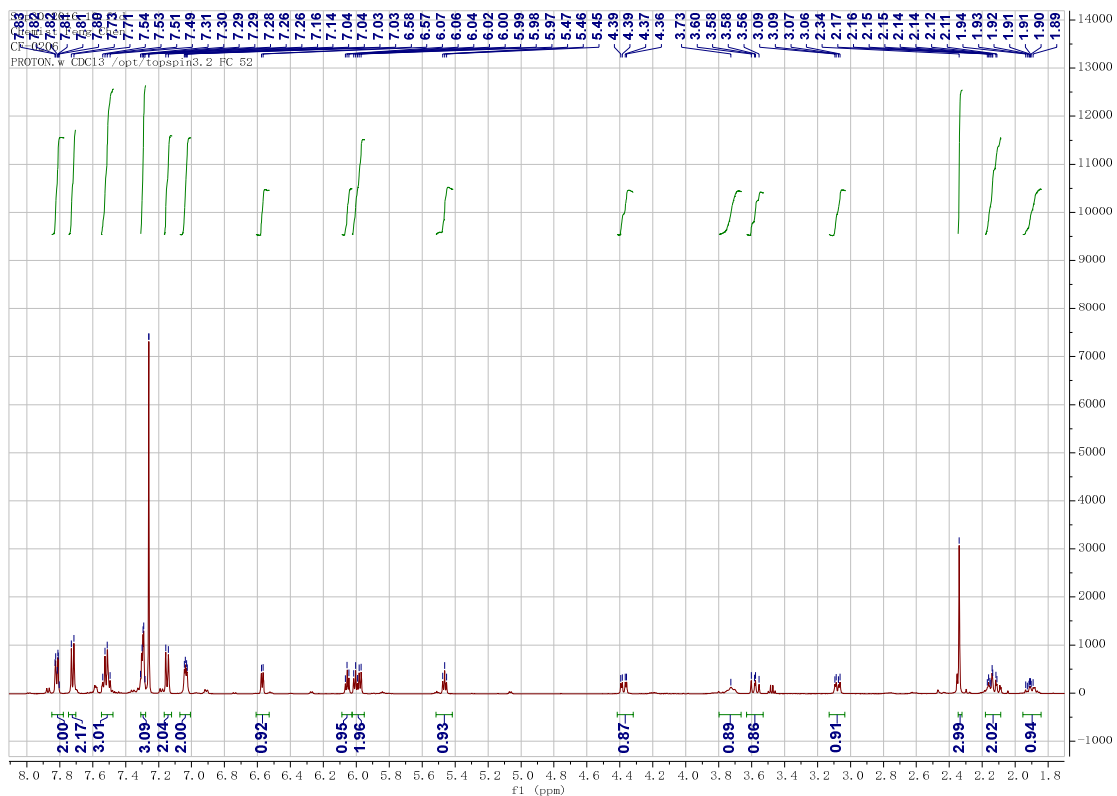

Figure S3.  $^1\text{H}$  NMR spectrum of complex 2

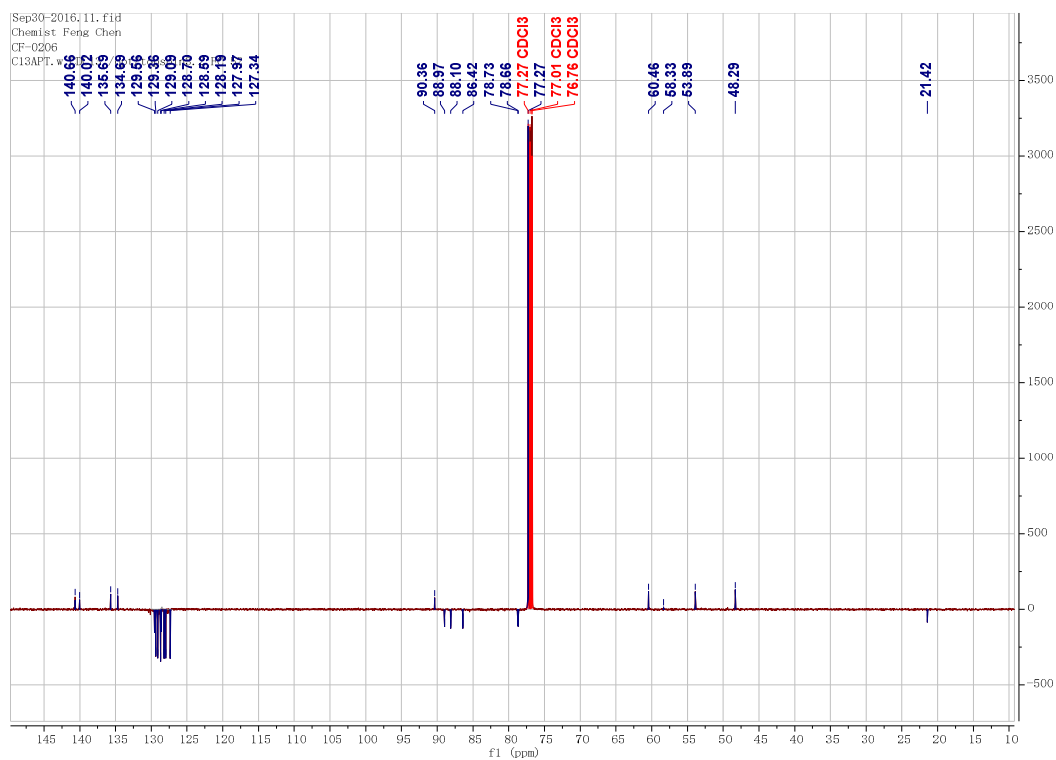

Figure S4.  $^{13}\text{C}$  NMR spectrum of complex 2



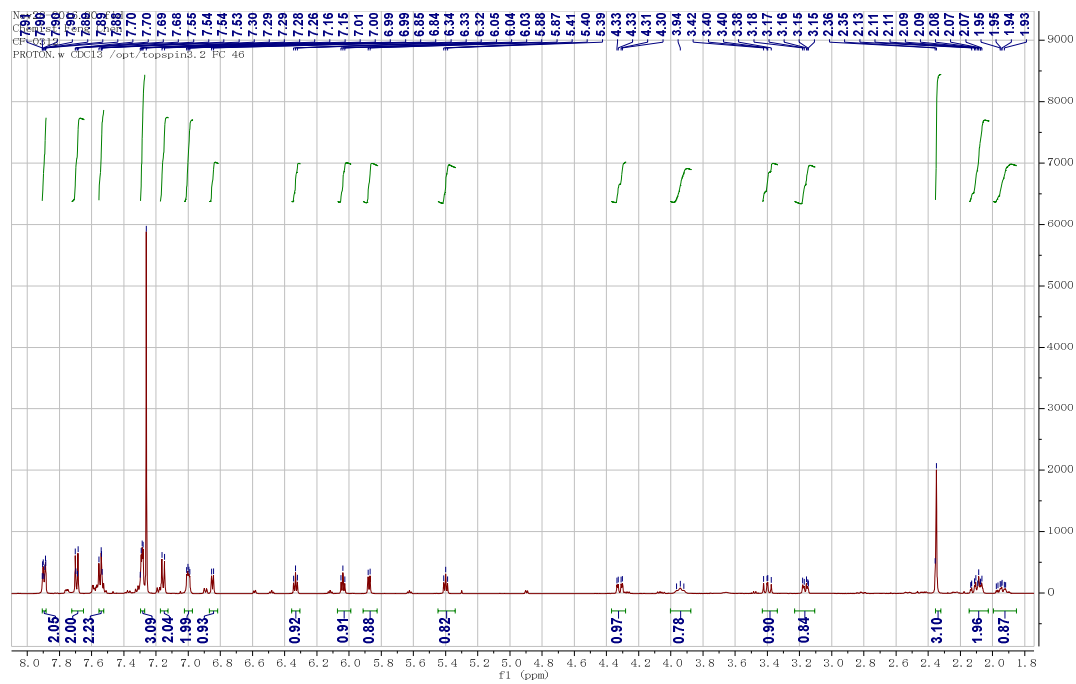

Figure S5.  $^1\text{H}$  NMR spectrum of complex **3**

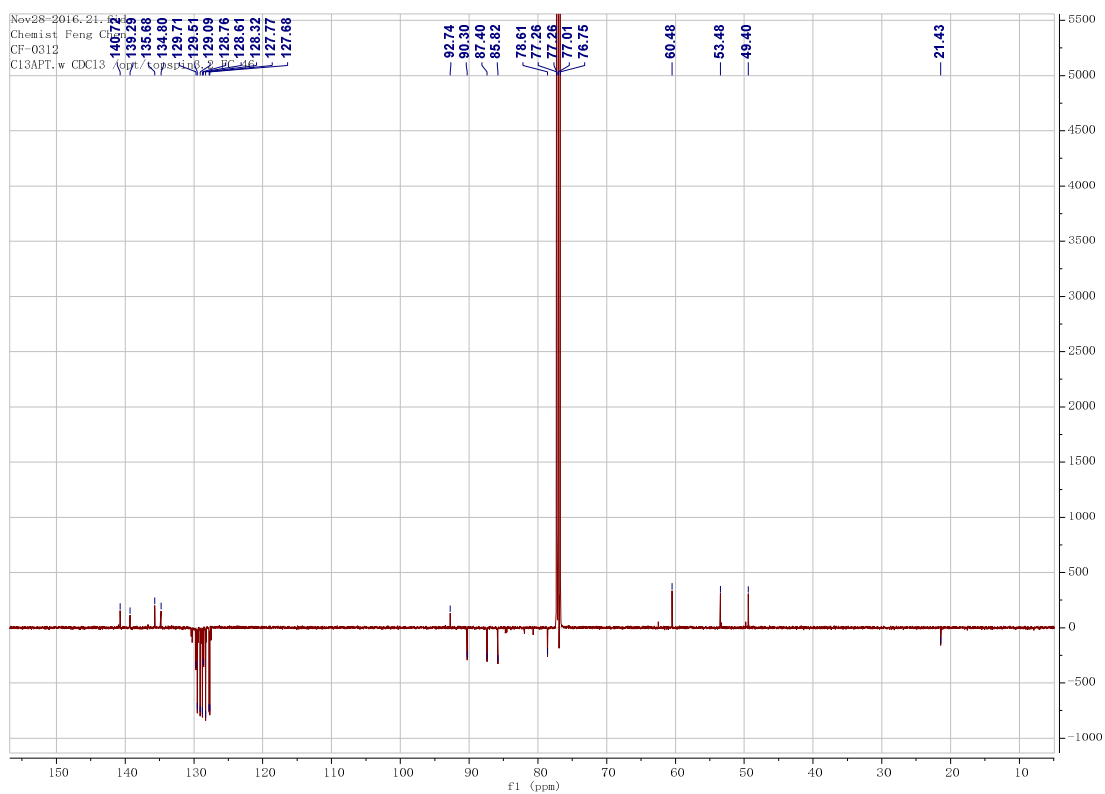

Figure S6.  $^{13}\text{C}$  NMR spectrum of complex **3**

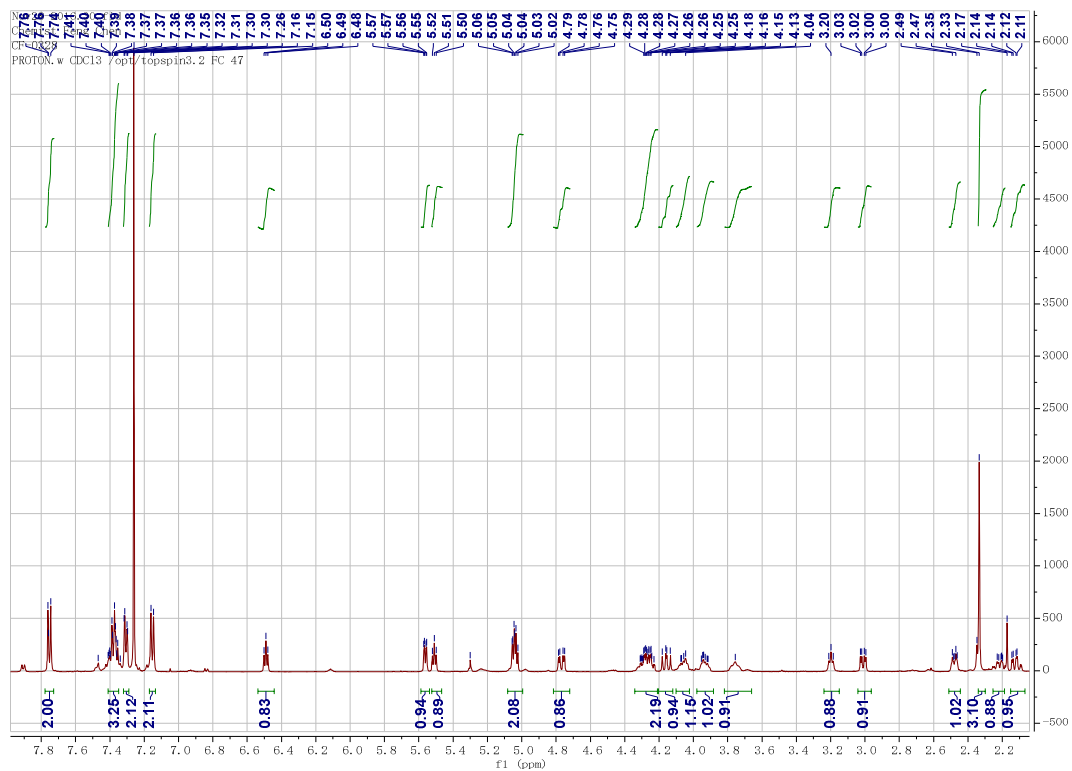

Figure S7.  $^1\text{H}$  NMR spectrum of complex 4

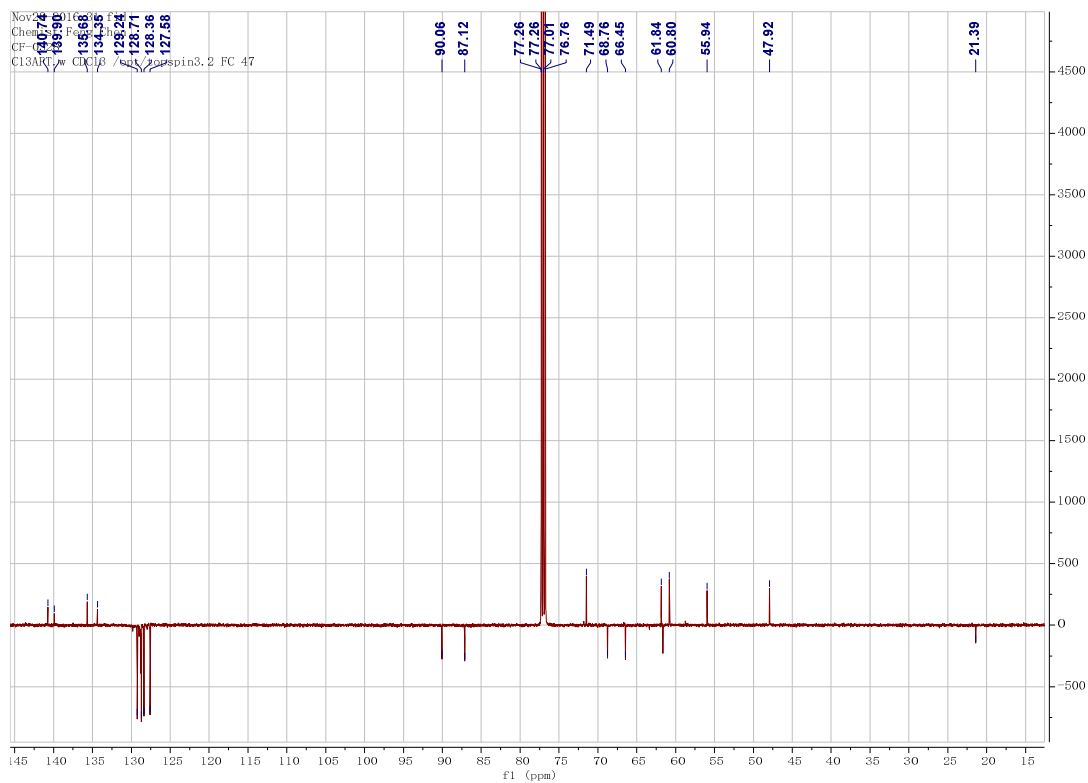

Figure S8.  $^{13}\text{C}$  NMR spectrum of complex 4

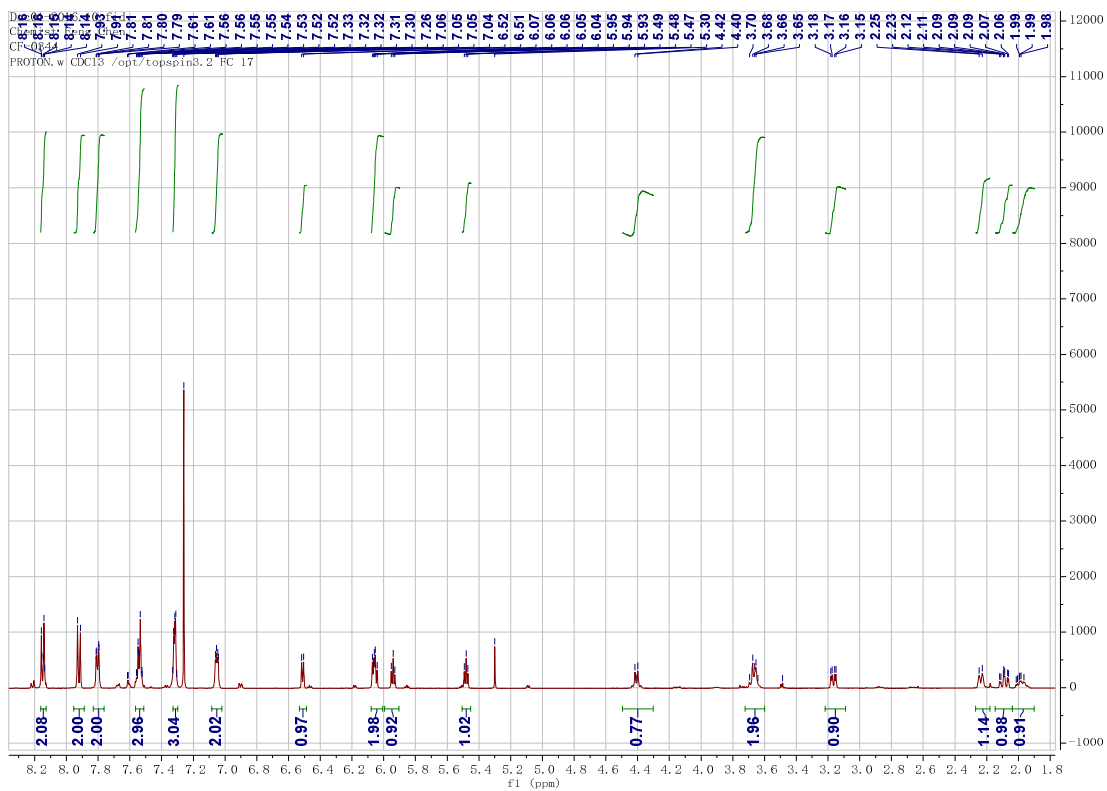

Figure S9.  $^1\text{H}$  NMR spectrum of complex 5

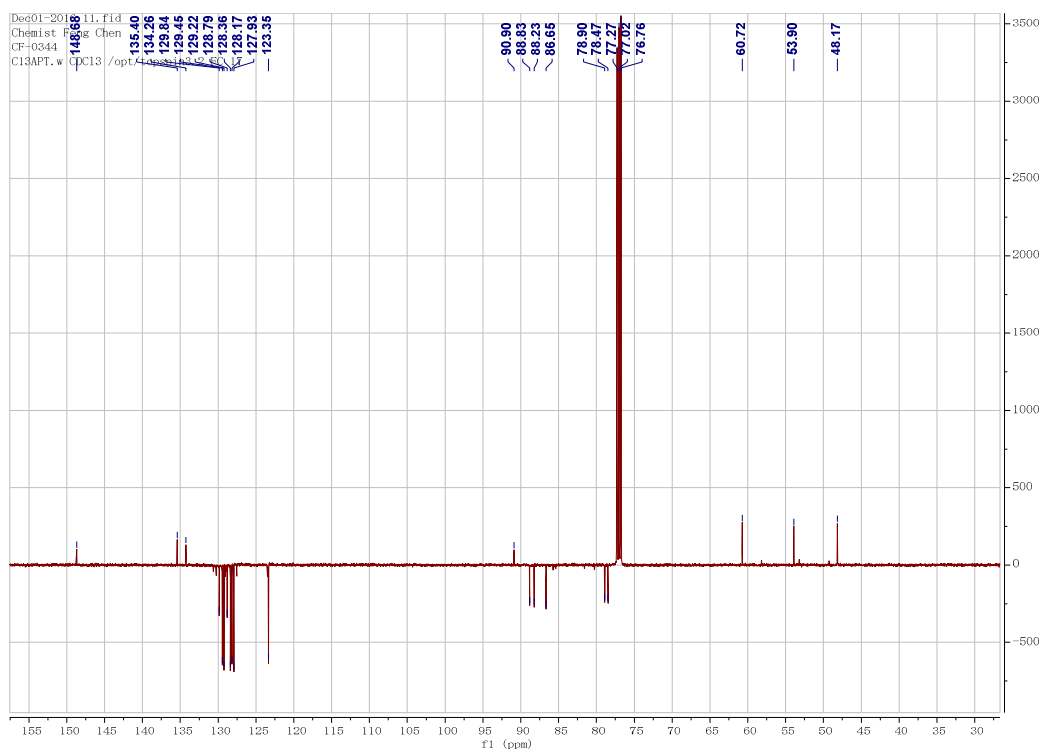

Figure S10.  $^{13}\text{C}$  NMR spectrum of complex 5

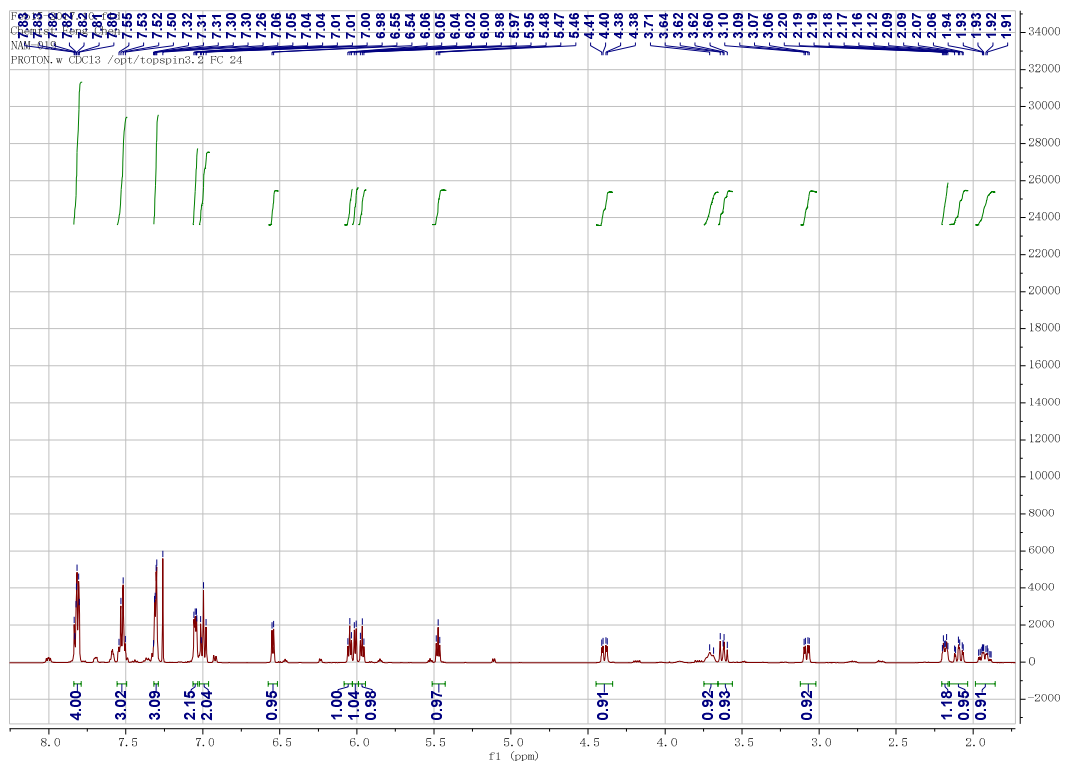

Figure S11.  $^1\text{H}$  NMR spectrum of complex 6

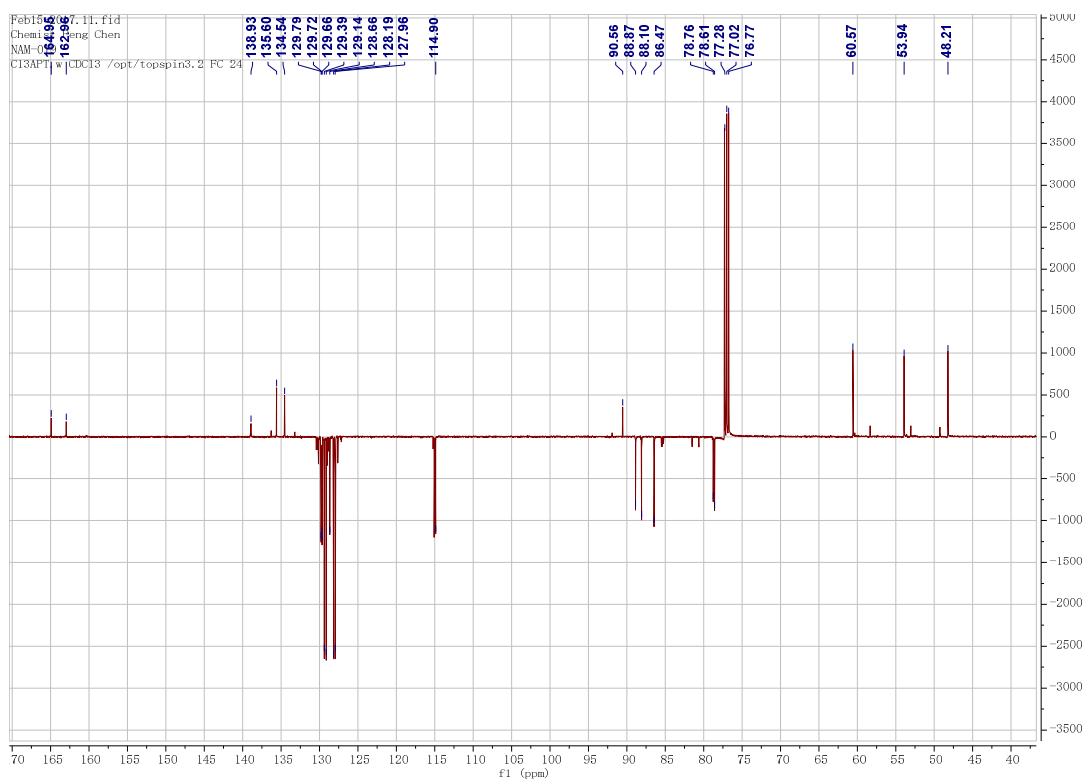

Figure S12.  $^{13}\text{C}$  NMR spectrum of complex 6

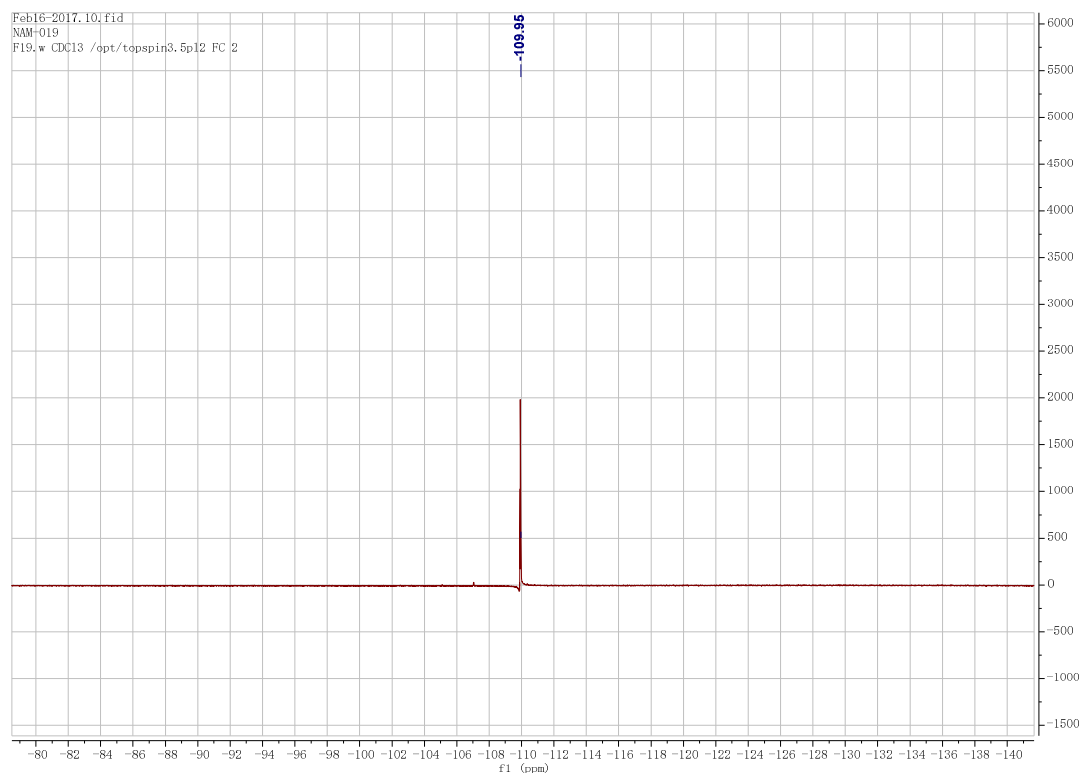

**Figure S13.**  $^{19}\text{F}$  NMR spectrum of complex **6**

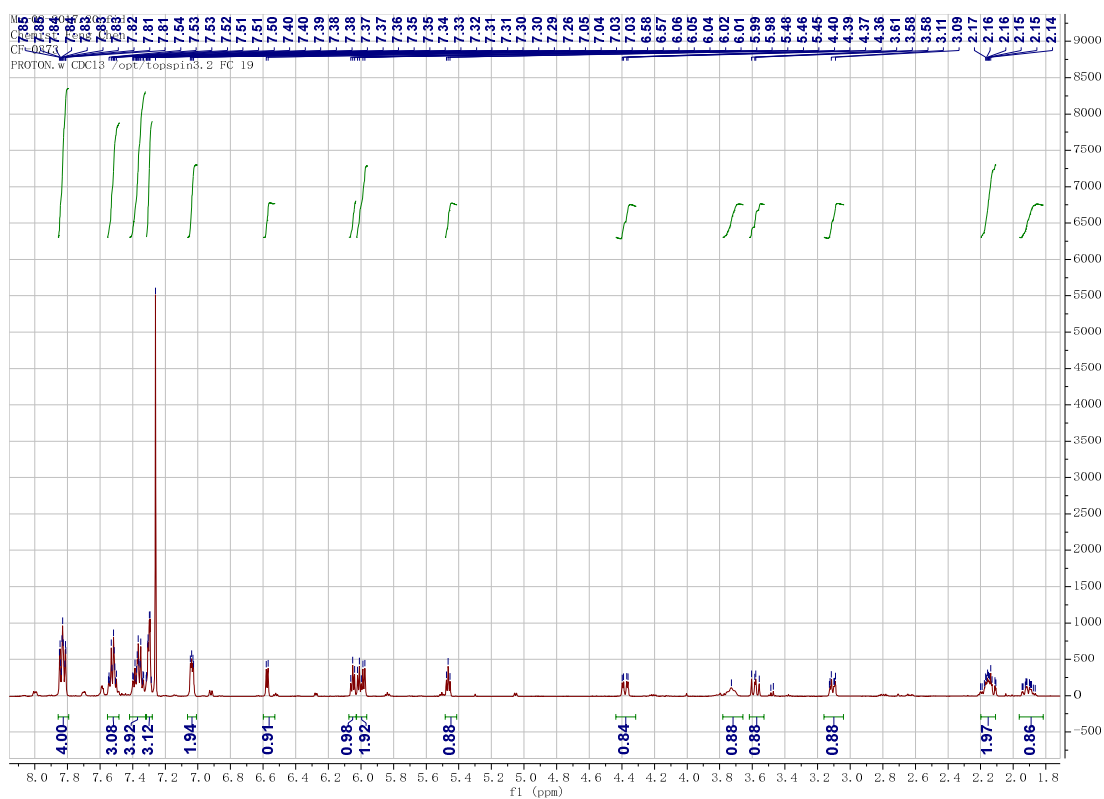

**Figure S14.**  $^1\text{H}$  NMR spectrum of complex **7**

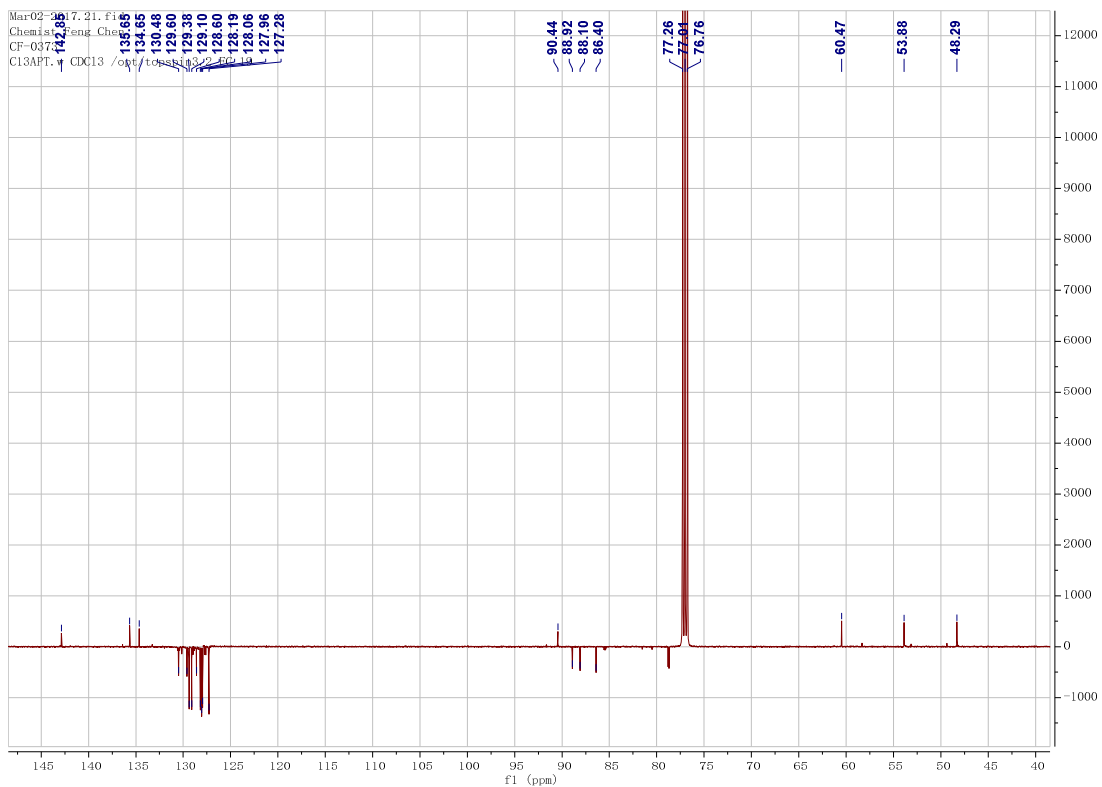

Figure S15.  $^{13}\text{C}$  NMR spectrum of complex 7

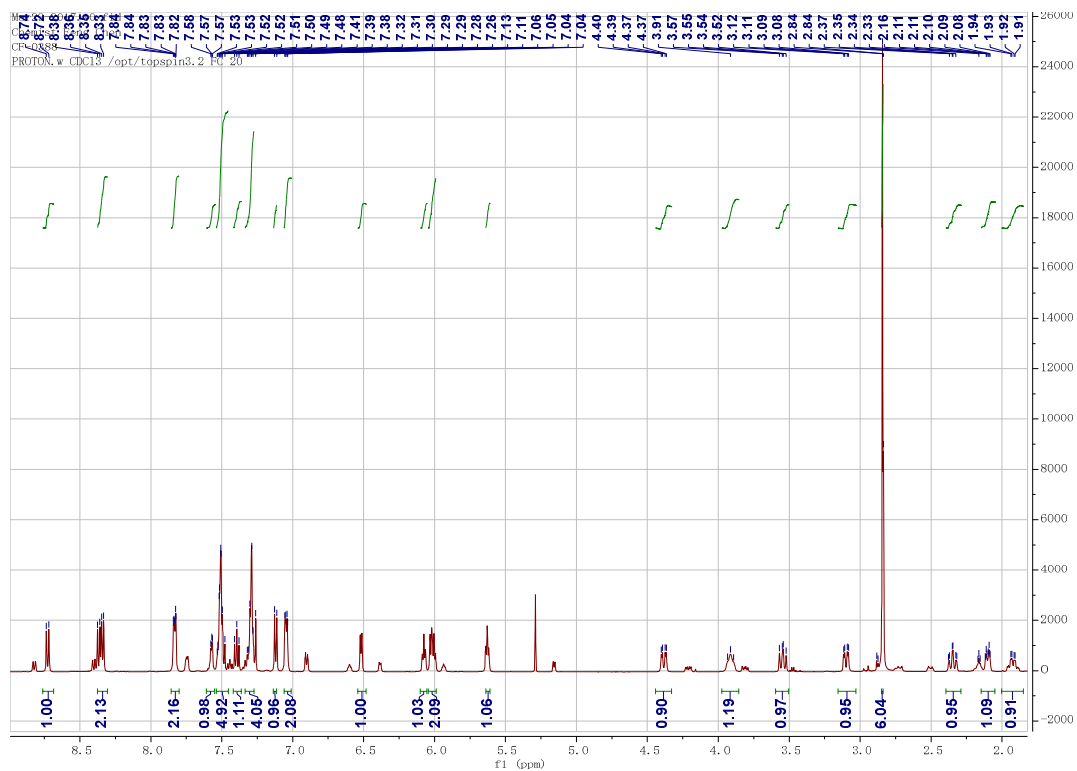

Figure S16.  $^1\text{H}$  NMR spectrum of complex 8

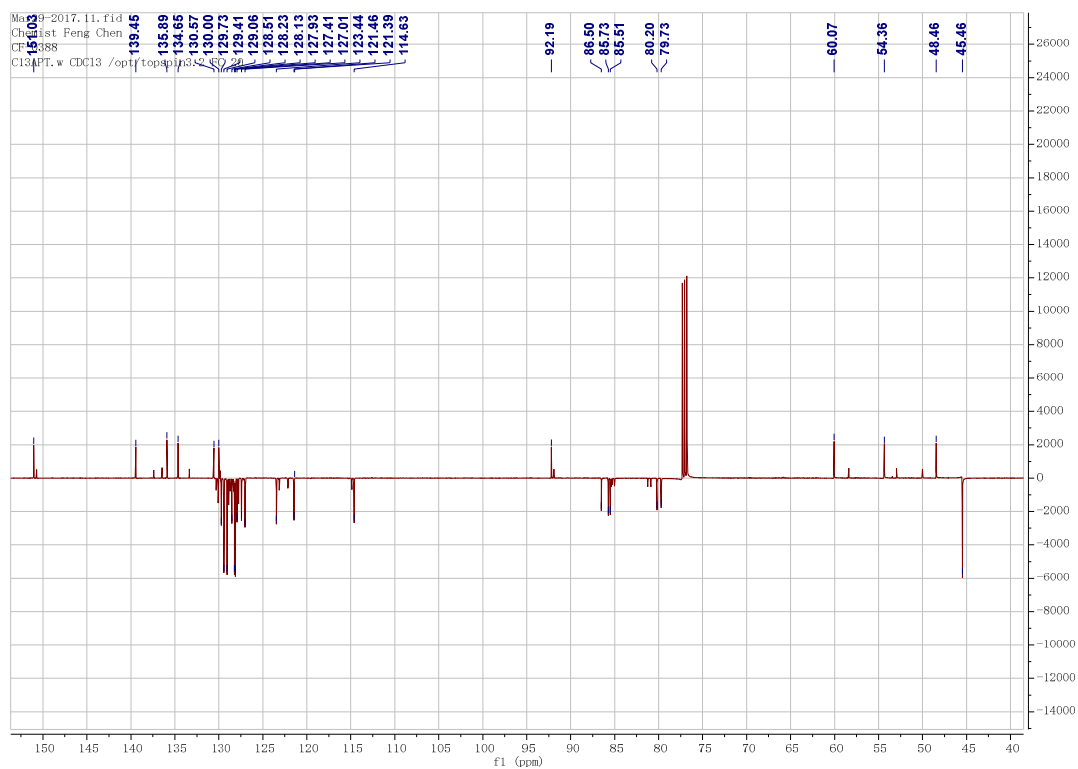

**Figure S17.**  $^{13}\text{C}$  NMR spectrum of complex **8**

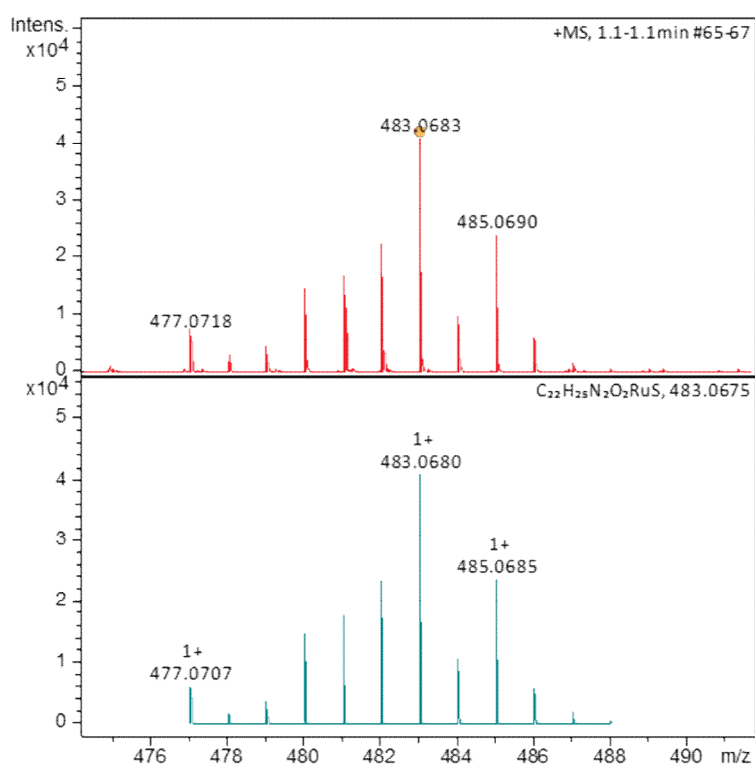

**Figure S18.** HRMS spectrum of complex **1**; top: acquired data, bottom: simulated data.

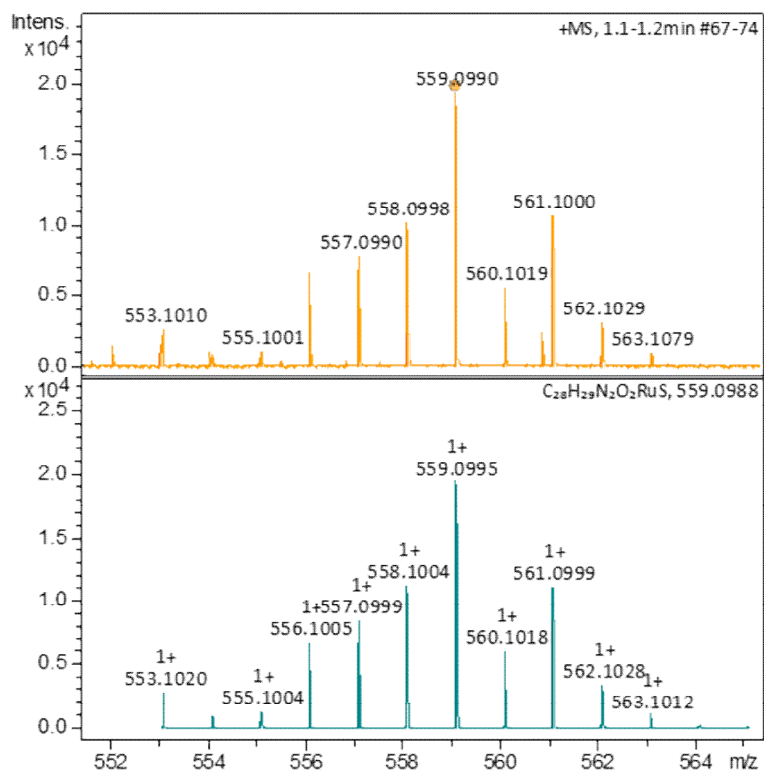

**Figure S19.** HRMS spectrum of complex 2; top: acquired data, bottom: simulated data.

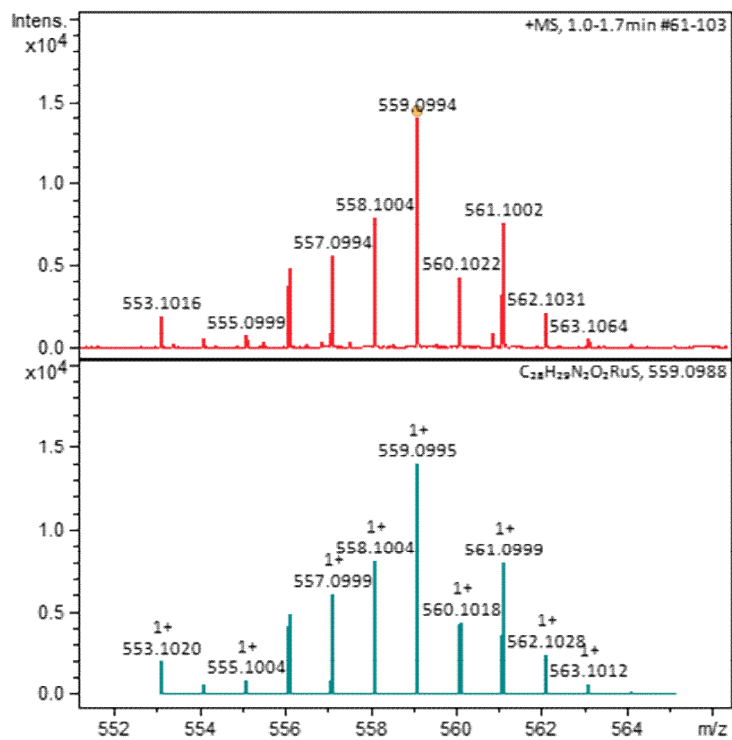

**Figure S20.** HRMS spectrum of complex 3; top: acquired data, bottom: simulated data.



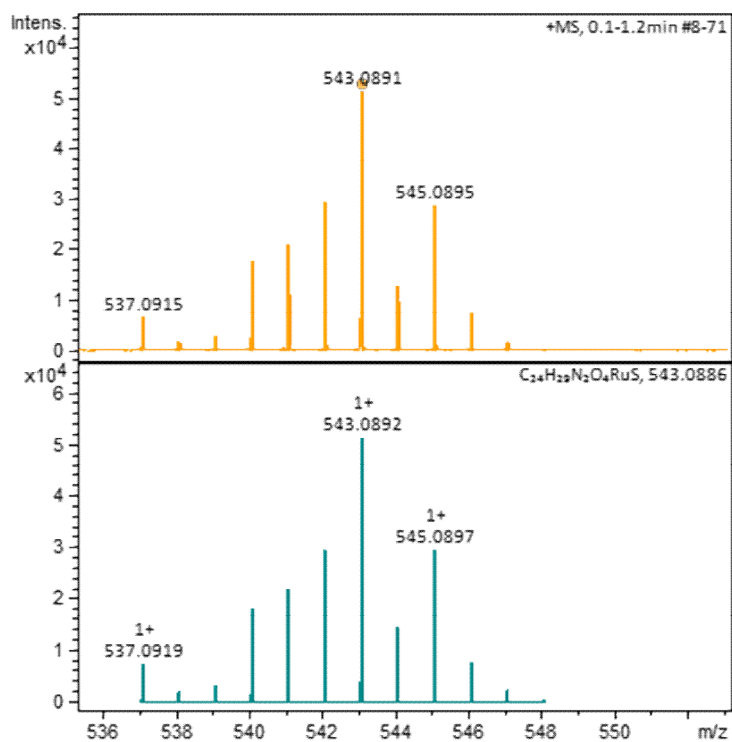

**Figure S21.** HRMS spectrum of complex **4**; top: acquired data, bottom: simulated data.

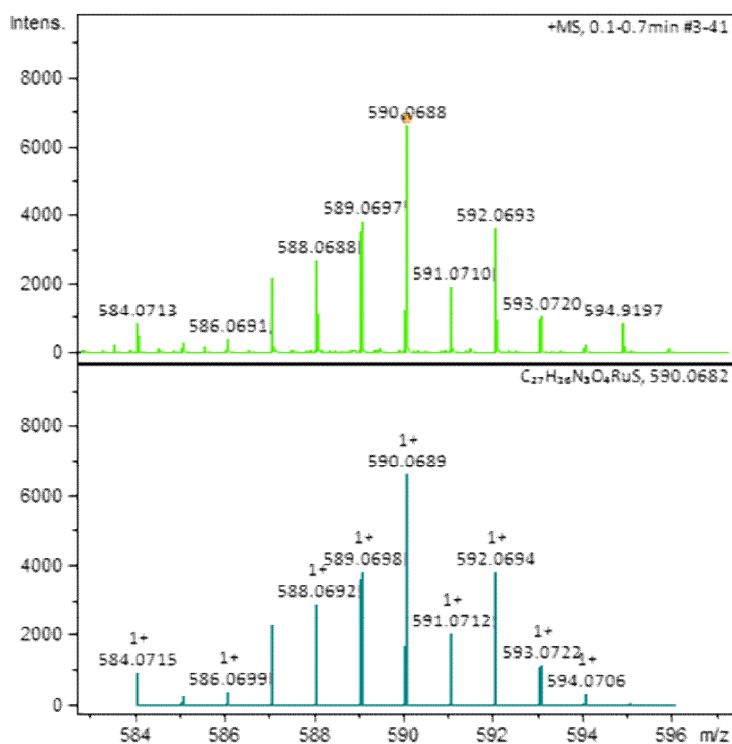

**Figure S22.** HRMS spectrum of complex **5**; top: acquired data, bottom: simulated data.

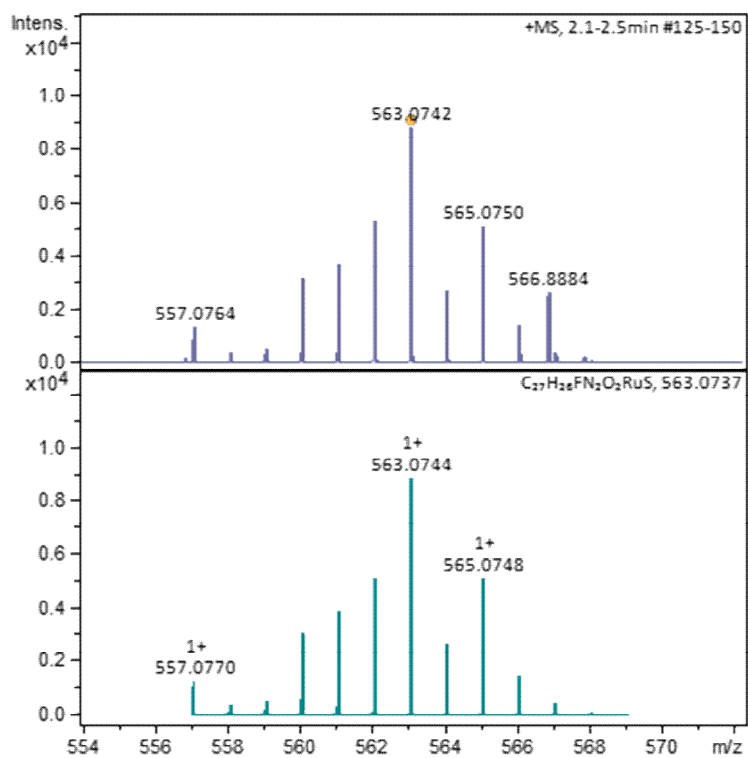

**Figure S23.** HRMS spectrum of complex **6**; top: acquired data, bottom: simulated data.

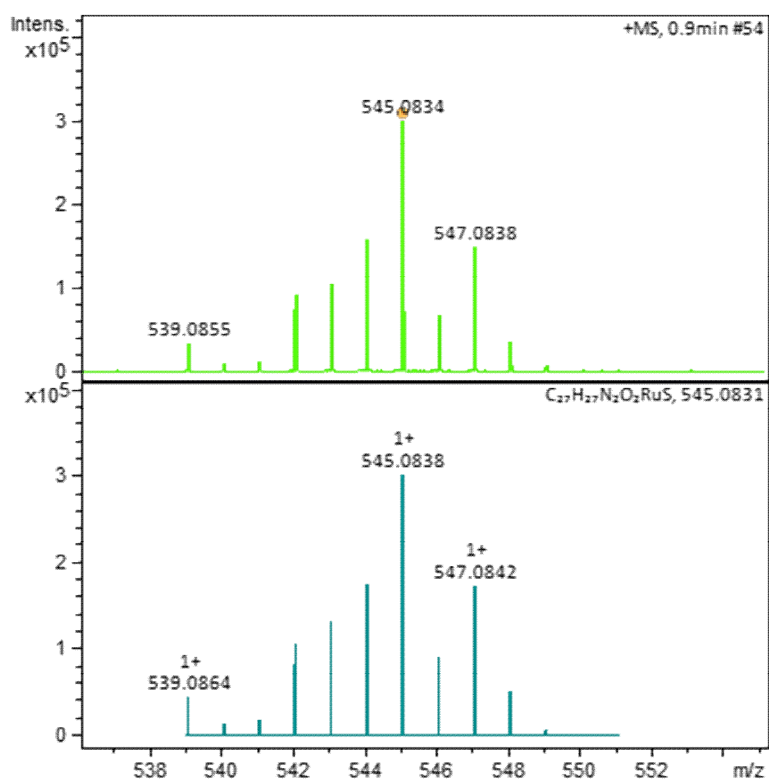

**Figure S24.** HRMS spectrum of complex **7**; top: acquired data, bottom: simulated data.

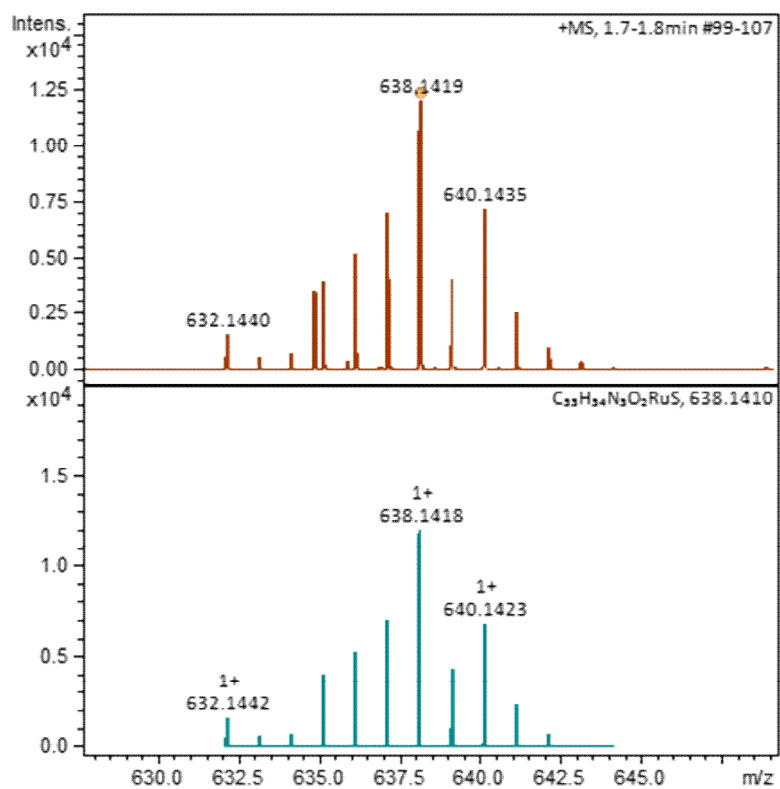

**Figure S25.** HRMS spectrum of complex **8**; top: acquired data, bottom: simulated data.

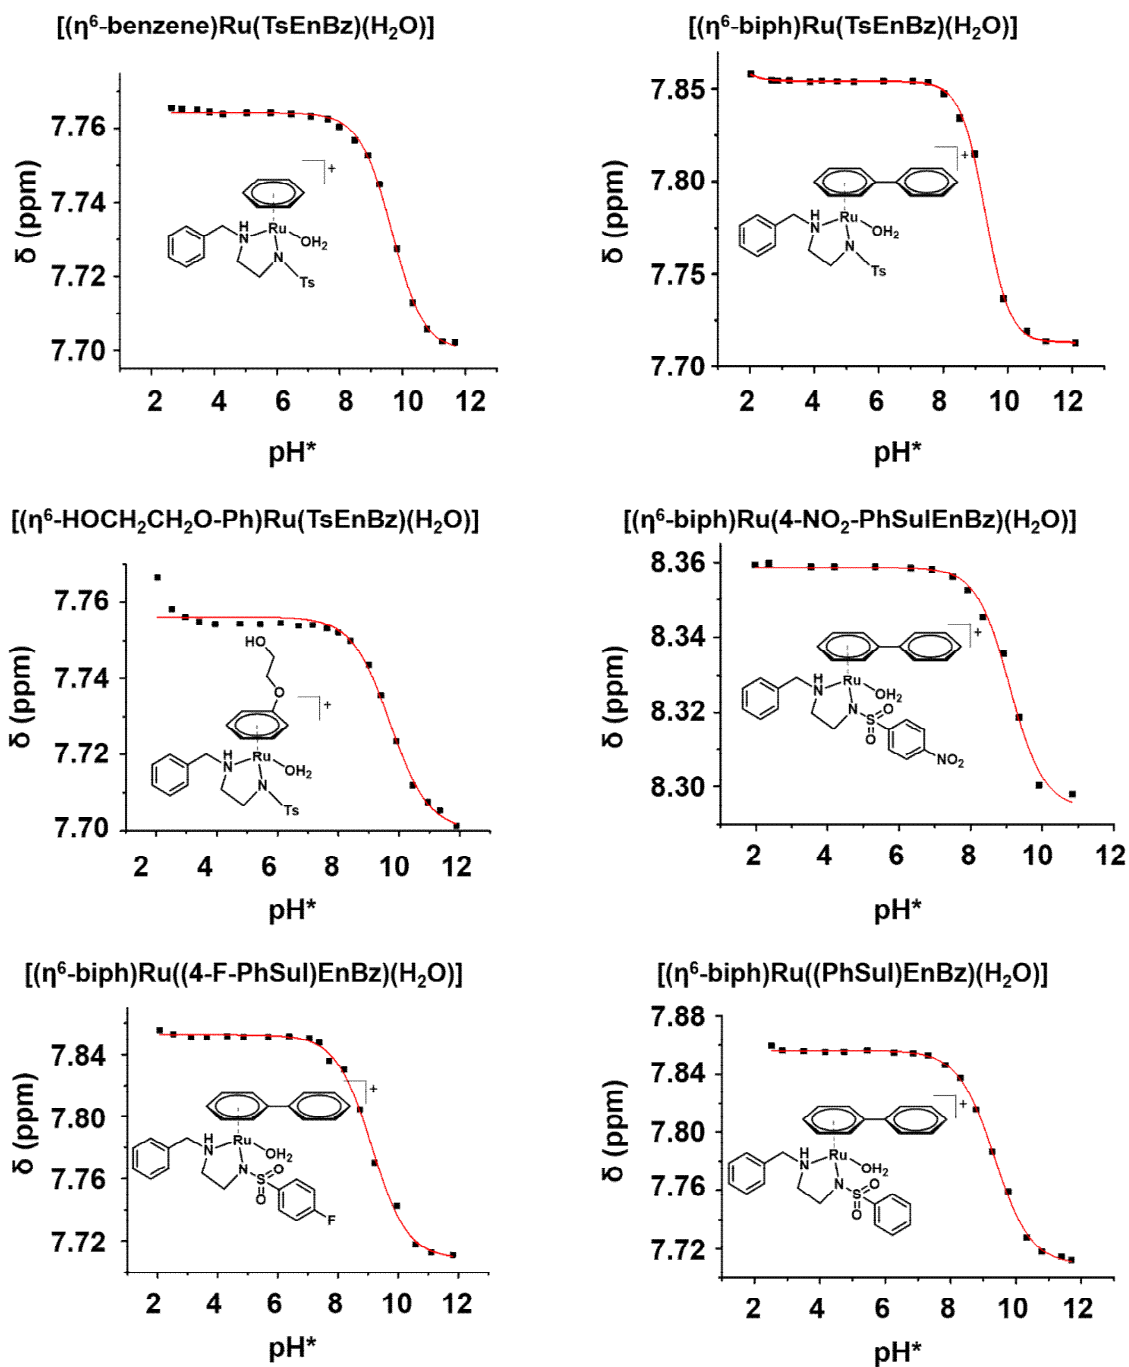

**Figure S26.** Dependence of NMR chemical shifts of the arene protons of aqua species of complexes **1**, **2** and **4-7** on pH\*. The lines (red) were fitted to Henderson-Hasselbalch equation with the  $pK_a^*$  values shown in Table 3.

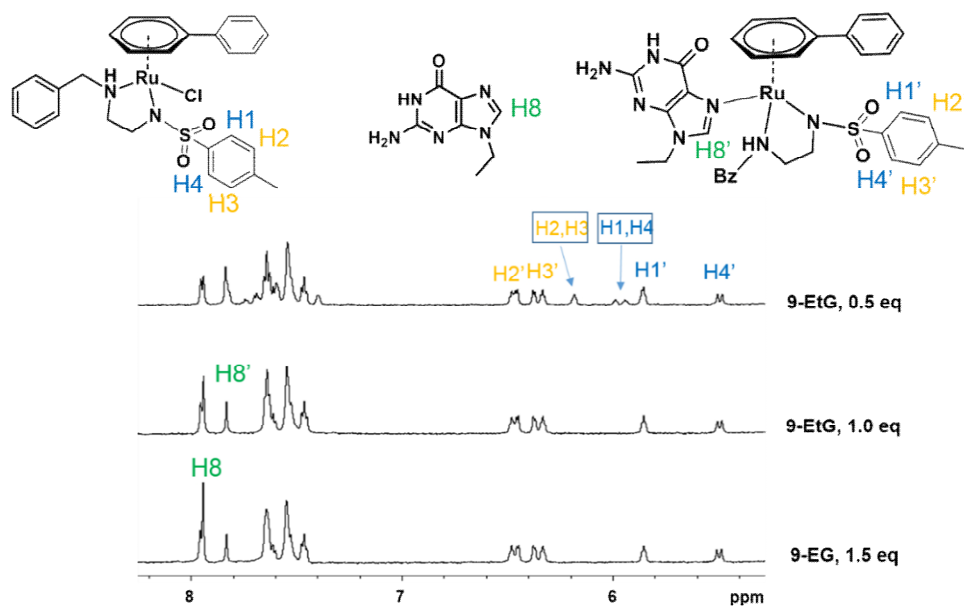

**Figure S27.** Low field region of  $^1\text{H}$  NMR spectra for titration of complex **2** (2 mM) with 9-ethylguanine (9-EG, 1 mM – 3 mM, 0.5 – 1.5 mol equiv) in 10% MeOD- $d_4$ /90%  $\text{D}_2\text{O}$ ,  $\text{pH}^*$  7.2, 310 K. Blue arrows correspond to unreacted Ru complex.

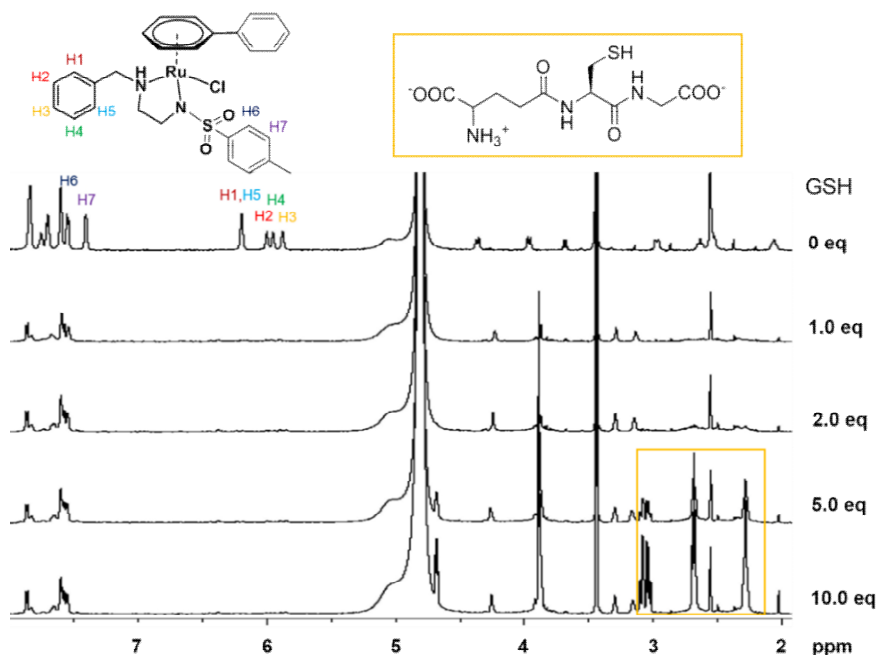

**Figure S28.**  $^1\text{H}$  NMR spectra (600 MHz) for reactions between complex **8** and various concentrations of GSH (1.0-10 mol equiv) in MeOD- $d_4$  and  $\text{D}_2\text{O}$  (2:8, v/v). The  $\text{pH}^*$  was adjusted to  $7.2 \pm 0.1$  and all spectra were recorded at 310 K. Peaks for unreacted excess GSH are in the orange box.

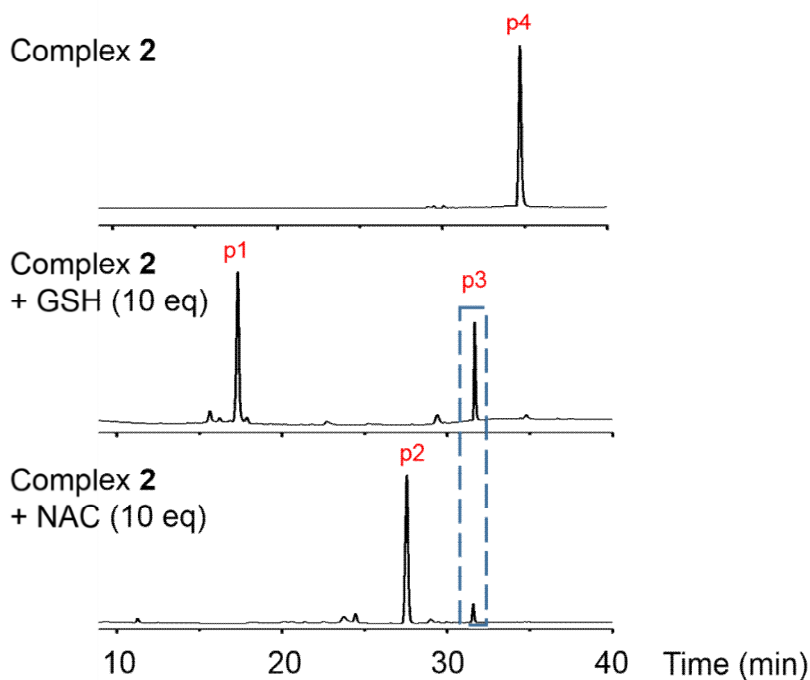

**Figure S29.** HPLC chromatograms for reactions of complex **2** with GSH or NAC monitored at 254 nm. Solutions of complex **2** (2 mM, MeOH/H<sub>2</sub>O, 1:9 (v/v)) with GSH or NAC (20 mM, H<sub>2</sub>O) were pre-incubated for 24 h at 310 K. pH values of the solutions were adjusted to 7.2 ± 0.1. Column: ZORBAX Eclipse XDB-C18, 9.4 × 250 mm, 5 μm; eluent gradients, acetonitrile%(min): 2%(0), 12%(10), 15%(15), 25%(25), 50%(30), 50%(50), 2%(55); trifluoroacetic acid (TFA) was used to optimise the shape of the peak. Peak assignments are shown in **Table S3**.

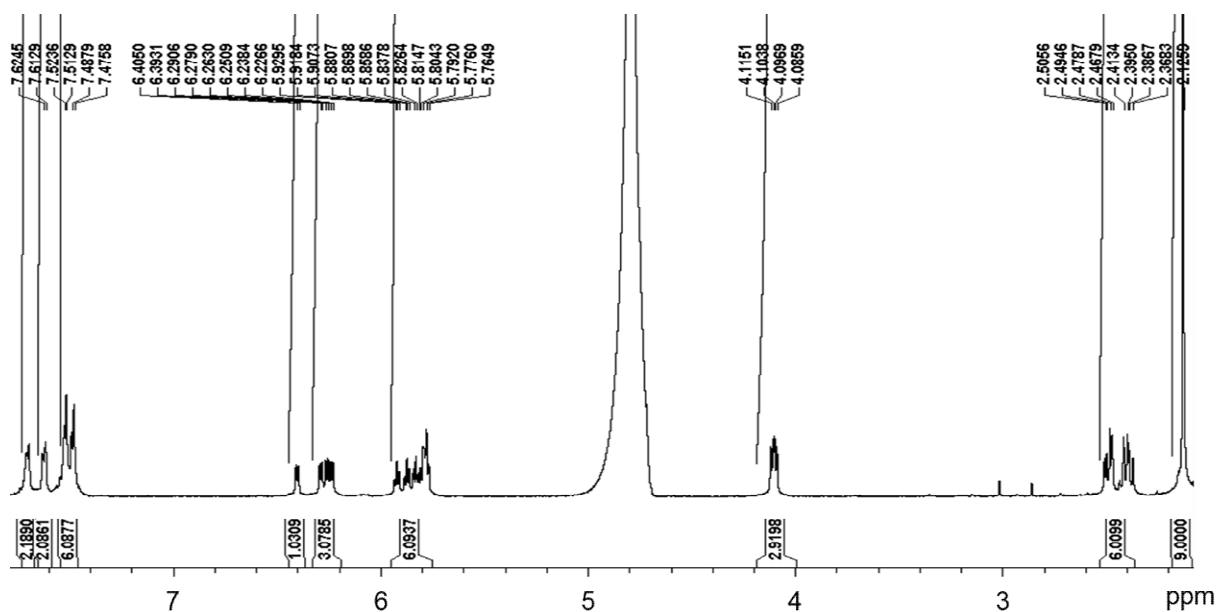

**Figure S30.** <sup>1</sup>H NMR spectrum of  $[(\eta^6\text{-biph})_2\text{Ru}_2(\text{NAC-H})_3]^{2-}$ , complex **2b**.

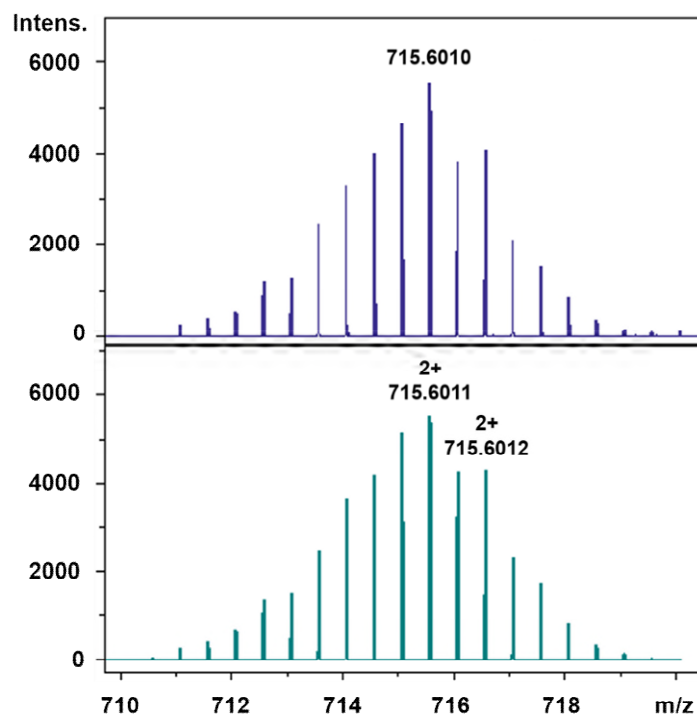

**Figure S31.** High resolution mass spectrum for  $[(\eta^6\text{-biph})_2\text{Ru}_2(\text{GS})_3+4\text{H}]^{2+}$  assignable to complex **2a**  $[(\eta^6\text{-biph})_2\text{Ru}_2(\text{GS})_3]^{2+}$ ; top: acquired data, bottom: simulated data.

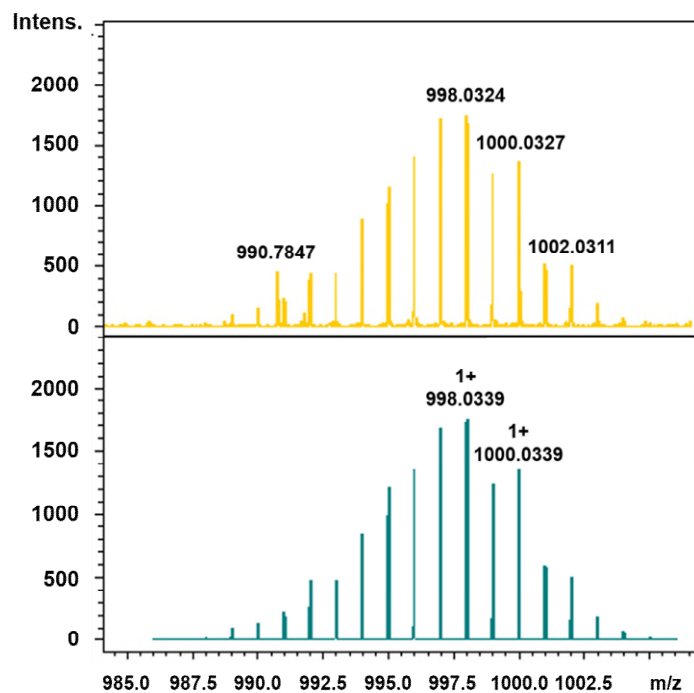

**Figure S32.** High resolution mass spectrum for  $[(\eta^6\text{-biph})_2\text{Ru}_2(\text{NAC})_3]^+$  assignable to complex **2b**  $[(\eta^6\text{-biph})_2\text{Ru}_2(\text{NAC-H})_3]^{2+}$ ; top: acquired data, bottom: simulated data.

## Reference

1. F. Chen, J. J. Soldevila-Barreda, I. Romero-Canelón, J. P. C. Coverdale, J.-I. Song, G. J. Clarkson, J. Kasparikova, A. Habtemariam, V. Brabec, J. A. Wolny, V. Schünemann, P. J. Sadler, *Dalton Trans.*, 2018, **47**, 7178–7189.
